Morales et al. Fronts are ecotones but not diversity hotspots

**Are oceanic fronts ecotones? Seasonal changes along the Subtropical Front show  
fronts as bacterioplankton transition zones but not diversity hotspots**

Sergio E. Morales<sup>1\*</sup>, Moana Meyer<sup>2</sup>, Kim Currie<sup>3,4</sup>, Federico Baltar<sup>2,3\*\*</sup>

<sup>1</sup>Department of Microbiology and Immunology, University of Otago, PO Box 56, Dunedin  
9054, New Zealand

<sup>2</sup>Department of Marine Science, University of Otago, PO Box 56, Dunedin 9054, New  
Zealand

<sup>3</sup>NIWA/University of Otago Research Centre for Oceanography, PO Box 56, Dunedin 9054,  
New Zealand

<sup>4</sup>Department of Chemistry, University of Otago, PO Box 56, Dunedin 9054, New Zealand

Correspondance:

\* Sergio E. Morales, University of Otago, Department of Microbiology and  
Immunology, 720 Cumberland Street, North Dunedin, Dunedin 9054, New Zealand

Email: [sergio.morales@otago.ac.nz](mailto:sergio.morales@otago.ac.nz)

\*\* Federico Baltar, Department of Marine Science, University of Otago, PO Box 56,  
Dunedin 9054, New Zealand

Email: [federico.baltar@otago.ac.nz](mailto:federico.baltar@otago.ac.nz), Phone: +64 3 479 5621

*Running title:* Fronts are ecotones but not diversity hotspots

*Keywords:* oceanic fronts /bacterioplankton / ecotone / Subtropical Frontal Zone  
/South Pacific Ocean

Morales et al. Fronts are ecotones but not diversity hotspots

1           **Ecotones are regarded as diversity hotspots in terrestrial systems, but it is**  
2           **unknown if this “ecotone effect” occurs in the marine environment. Oceanic**  
3           **fronts are widespread mesoscale features, present in the boundary between**  
4           **different water masses, and are arguably the best potential examples of ecotones**  
5           **in the ocean. Here we performed the first seasonal study along an oceanic front,**  
6           **combining 16S rRNA gene sequencing coupled with a high spatial resolution**  
7           **analysis of the physical properties of the water masses. Using the Subtropical**  
8           **Frontal Zone off New Zealand we demonstrate that fronts delimit shifts in**  
9           **bacterioplankton community composition between water masses, but that the**  
10           **strength of this effect is seasonally dependent. While creating a transition zone**  
11           **where physicochemical parameters and bacterioplankton communities get**  
12           **mixed, this ecotone does not result in increased diversity. Thus unlike terrestrial**  
13           **ecotones, oceanic ecotones like fronts are boundaries but not hotspot of**  
14           **bacterioplankton diversity in the ocean.**

15

16           Ecotones are boundaries, or transition zones, between ecological communities,  
17           ecosystems, or ecological regions usually formed by steep environmental gradients  
18           (Kark 2013). In terrestrial systems, species richness, abundances and productivity  
19           tend to peak in ecotones (Kark 2013, Smith et al 1997). However, the study of  
20           ecotones and its effects in the open ocean environment has not received the same  
21           attention as in terrestrial systems, probably because transition zones are not as easy to  
22           detect as in land. The best example of ecotones in the marine environment is oceanic  
23           fronts. Fronts are areas where distinct water masses meet creating enhanced horizontal  
24           gradients of physicochemical properties (e.g. temperature, salinity) (Belkin 2003).  
25           Fronts are widespread and linked to large effects on marine ecosystems (Le Fevre

Morales et al. Fronts are ecotones but not diversity hotspots

26 1987, Longhurst 2006), including increased phytoplankton diversity (Barton et al  
27 2010, Ribalet et al 2010) and productivity (Belkin et al 2009, Okkonen et al 2004,  
28 Springer et al 1996), yet their role in demarking bacterioplankton (i.e., defined as  
29 bacteria and archaea) communities shifts is unclear. This is critical since heterotrophic  
30 bacterioplankton make up the largest living biomass in the ocean, and drive oceanic  
31 biogeochemical cycles, regulating the composition of Earth's atmosphere and  
32 influencing climate (Buchan et al 2014, Kirchman 2010). Prior work revealed oceanic  
33 fronts can act as ecotones, creating boundaries for bacterioplankton distribution in the  
34 ocean (Baltar et al 2016a). However, limited sampling and strong seasonal variability  
35 prevented testing of whether the front acted as a bacterioplankton diversity hotspot.

36 Here we performed the first seasonal high spatial resolution transect study of  
37 bacterioplankton diversity across an oceanic front (the Subtropical Frontal Zone off  
38 New Zealand). This study involved 6 sampling cruises from January 2014 to April  
39 2015. We combined a high-resolution characterization of the front (via a continuous  
40 temperature and salinity recorder) and the analysis of bacterioplankton diversity  
41 (based on 16S rRNA gene Illumina sequencing (see Supplementary Information)). In  
42 all the cruises, bacterioplankton diversity and chlorophyll-a concentration was  
43 sampled at eight surface (2 m) water stations along the 48 km long transect, following  
44 the same approach as in previous studies (Baltar et al 2015, Baltar et al 2016a). The  
45 Subtropical Front is where the warm and salty subtropical waters (STW) and the cold,  
46 high-nutrient low-chlorophyll sub-Antarctic waters (SAW) meet. This front is  
47 constrained along the SE continental shelf of New Zealand to about 40-50 km  
48 offshore, compacting the frontal zone to a width of 2-10 km (Heath 1972).

49 Temperature and salinity changes along the transect retained the same structure

Morales et al. Fronts are ecotones but not diversity hotspots

50 throughout the study, with the presence of the 3 main water masses located in this  
51 area (Fig. 1A). Off the coast, the low salinity neritic waters (NW; characterized by  
52 riverine inputs) encounter and gradually mix with the warmer and saltier subtropical  
53 waters (STW). This is followed by a sharp (taking place in < 2 km between stations 3  
54 and 5) drop in temperature and salinity, demarking the front and the convergence of  
55 the STW with the offshore SAW. As previously reported in other studies across this  
56 transect (Jillett, 1969; Heath, 1972; Shaw and Vennell, 2001; Hopkins et al., 2010),  
57 the location, width and strength of the front oscillates seasonally (Fig. 1B) (Heath  
58 1972, Hopkins et al 2010, Jones et al 2013).

59 A clear water mass dependent seasonal change in phytoplankton biomass  
60 (chlorophyll-a) was observed along the transect (Fig. 2A). These blooms within the  
61 STW coincided with the transition from the Austral winter (June-July 2014) to the  
62 spring-summer seasons, as well as a smaller autumnal bloom. Observed chlorophyll-a  
63 concentrations reached  $>4 \text{ mg m}^{-3}$  in December 2014 and  $>2 \text{ mg m}^{-3}$  in April 2015  
64 during the study, in agreement with previous studies where the threshold of  $>1 \text{ mg m}^{-3}$   
65 indicated bloom conditions (Hopkins et al 2010, Jones et al 2013). While strong  
66 seasonality in phytoplankton biomass was detected in the STW, changes in the NW  
67 and front were less pronounced, and absent within the SAW. This is consistent with  
68 the characteristic iron-limited primary production of the high-nutrient low-chlorophyll  
69 SAW (Baltar et al 2015, Jones et al 2013, Sander et al 2014). However, chlorophyll-a  
70 concentrations were not higher within the frontal waters at any time point, with  
71 values intermediate to those in STW and SAW, reflecting the mixing nature of fronts.

72 Changes in chlorophyll-a concentration were negatively correlated ( $p < 0.01$ ) to  
73 bacterioplankton diversity (based on the Shannon Index), with fluctuations across the

Morales et al. Fronts are ecotones but not diversity hotspots

74 transect modified by seasons (Fig2 B-D, and Tables S1-2). Changes in Shannon  
75 diversity were strongest across time (ANOVA F Ratio = 51.60, p value <.0001), with  
76 no significant effect across the water masses (p = 0.45) unless time was accounted for  
77 (water mass x time: F Ratio = 5.13, p value <.0001). While changes in  
78 bacterioplankton richness were observed and mirrored trends in diversity, it suggests  
79 that community structure (changes in evenness) where the strongest factor. Maximum  
80 diversity occurred during winter (June and July 2014) and the lowest in summer  
81 (December 2014). This inverse relationship between bacterioplankton diversity and  
82 phytoplankton biomass is consistent with the common negative diversity–productivity  
83 relationship found in aquatic ecosystems (Baltar et al 2016b, Smith 2007). This is  
84 specifically pronounced in areas with larger blooms (STW and the frontal waters)  
85 (Fig. 2D), which are the water masses with the strongest seasonal variations in  
86 chlorophyll-a and bacterioplankton diversity. Consistent with observations for  
87 phytoplankton biomass, bacterioplankton diversity did not peak in the front, with  
88 diversity values intermediate to those for SAW and STW.

89 Our results demonstrate that while fronts serve as ecotones in the sense of  
90 delimiting the distribution of bacterioplankton, their strength is not constant, but  
91 seasonally driven. This seasonality is linked to differences in phytoplankton biomass  
92 across the different water masses (e.g. December 2014). While oceanic fronts are  
93 clear boundaries, we demonstrate that they are not bacterioplankton diversity hotspots  
94 in contrast to observations for terrestrial plants. This might be due to the more  
95 dynamic nature of oceanic fronts, that experience continuous mixing, enlarging and  
96 contracting events resulting in a less stable environment than terrestrial ecotones.

97

Morales et al. Fronts are ecotones but not diversity hotspots

98

99 **Conflict of interest**

100 The authors declare no conflict of interest.

101

102 **Acknowledgements**

103 We would like to thank the skippers and crew of the RV Polaris II for their help  
104 during the sampling events. FB was supported by a University of Otago Research  
105 Grant (UORG).

106

107 Supplementary information is available at The ISME Journal's website' at the end of  
108 the article and before the references.

109

110 **References**

111 Baltar F, Stuck E, Morales S, Currie K (2015). Bacterioplankton carbon cycling along  
112 the Subtropical Frontal Zone off New Zealand. *Progress in Oceanography* **135**: 168-  
113 175.

114

115 Baltar F, Currie K, Stuck E, Roosa S, Morales SE (2016a). Oceanic fronts: transition  
116 zones for bacterioplankton community composition. *Environmental Microbiology*  
117 *Reports*: 10.1111/1758-2229.12362.

118

119 Baltar F, Palovaara J, Unrein F, Catala P, Horňák K, Šimek K *et al* (2016b). Marine  
120 bacterial community structure resilience to changes in protist predation under  
121 phytoplankton bloom conditions. *The ISME Journal* **10**: 568–581.

122

123 Barton AD, Dutkiewicz S, Flierl G, Bragg J, Follows MJ (2010). Patterns of diversity  
124 in marine phytoplankton. *Science* **327**: 1509-1511.

125

Morales et al. Fronts are ecotones but not diversity hotspots

- 126 Belkin I (2003). Front. *Interdisciplinary Encyclopedia of Marine Sciences*, edited by  
127 Nybakken JW, Broenkow WW, Vallier TL: 433-436.  
128
- 129 Belkin IM, Cornillon PC, Sherman K (2009). Fronts in large marine ecosystems.  
130 *Progress in Oceanography* **81**: 223-236.  
131
- 132 Buchan A, LeCleir GR, Gulvik CA, González JM (2014). Master recyclers: features  
133 and functions of bacteria associated with phytoplankton blooms. *Nature Reviews*  
134 *Microbiology*. **12**: 686–698.  
135
- 136 Heath R (1972). The Southland Current. *New Zealand Journal of Marine and*  
137 *Freshwater Research* **6**: 497-533.  
138
- 139 Hopkins J, Shaw A, Challenor P (2010). The Southland front, New Zealand:  
140 variability and ENSO correlations. *Continental Shelf Research* **30**: 1535-1548.  
141
- 142 Jones KN, Currie KI, McGraw CM, Hunter KA (2013). The effect of coastal  
143 processes on phytoplankton biomass and primary production within the near-shore  
144 Subtropical Frontal Zone. *Estuarine, Coastal and Shelf Science* **124**: 44-55.  
145
- 146 Kark S (2013). Ecotones and ecological gradients. *Ecological Systems*. Springer. pp  
147 147-160.  
148
- 149 Kirchman DL (2010). *Microbial ecology of the oceans*, vol. 36. Wiley-Liss: New  
150 York.  
151
- 152 Le Fevre J (1987). Aspects of the biology of frontal systems. *Advances in Marine*  
153 *Biology* **23**: 163-299.  
154
- 155 Longhurst AR (2006). *Ecological geography of the sea*. Academic Press: New York,  
156 NY.  
157
- 158 Okkonen SR, Schmidt G, Cokelet E, Stabeno P (2004). Satellite and hydrographic  
159 observations of the Bering Sea ‘Green Belt’. *Deep Sea Research Part II: Topical*  
160 *Studies in Oceanography* **51**: 1033-1051.  
161
- 162 Ribalet F, Marchetti A, Hubbard KA, Brown K, Durkin CA, Morales R *et al* (2010).  
163 Unveiling a phytoplankton hotspot at a narrow boundary between coastal and offshore  
164 waters. *Proceedings of the National Academy of Sciences* **107**: 16571-16576.  
165
- 166 Sander SG, Tian F, Ibisami EB, Currie KI, Hunter KA, Frew RD (2014). Spatial and  
167 seasonal variations of iron speciation in surface waters of the Subantarctic front and  
168 the Otago Continental Shelf. *Mar Chem* **173**: 114–124.  
169
- 170 Smith TB, Wayne RK, Girman DJ, Bruford MW (1997). A role for ecotones in  
171 generating rainforest biodiversity. *Science* **276**: 1855-1857.  
172
- 173 Smith VH (2007). Microbial diversity–productivity relationships in aquatic  
174 ecosystems. *FEMS Microbiology Ecology* **62**: 181-186.  
175

Morales et al. Fronts are ecotones but not diversity hotspots

176 Springer AM, McRoy CP, Flint MV (1996). The Bering Sea green belt: Shelf-edge  
177 processes and ecosystem production. *Fisheries Oceanography* **5**: 205-223.  
178  
179



Morales et al. Fronts are ecotones but not diversity hotspots

180 **Figure legends**

181 **Figure 1. (A)** Physicochemical changes in salinity (dashed) and temperature (solid)  
182 along the surface waters of the transect in April 2015, as a representation of the  
183 general structure of the water masses encountered in study region. The stations are  
184 shown as vertical lines, with their predicted water masses given by colour. Salmon  
185 pink = Neritic Water (NW), Green = Subtropical Water (STW), Blue = Frontal Water,  
186 Purple = Sub-Antarctic Water (SAW). This is an example of how the water masses  
187 were in April 2015, but their location shift throughout the study. **(B)** Summary of how  
188 the water masses shifted throughout the duration of the study, with sampling locations  
189 shown in black.

190

191 **Figure 2. (A)** Chlorophyll-a concentration, and **(B)** bacterioplankton diversity  
192 (Shannon index) in the surface waters along the transect in the six cruises performed  
193 from January 2014 to April 2015. Different sampling cruises are denoted in different  
194 colors, and the symbols denote different water masses. **(C)** Relation between  
195 chlorophyll-a concentration and bacterioplankton diversity (Shannon index) with all  
196 samples pooled together or **(D)** with samples separated by water mass. Neritic Water  
197 (NW), Sub-Antarctic Water (SAW), Subtropical Water (STW), frontal zone  
198 (FRONT).

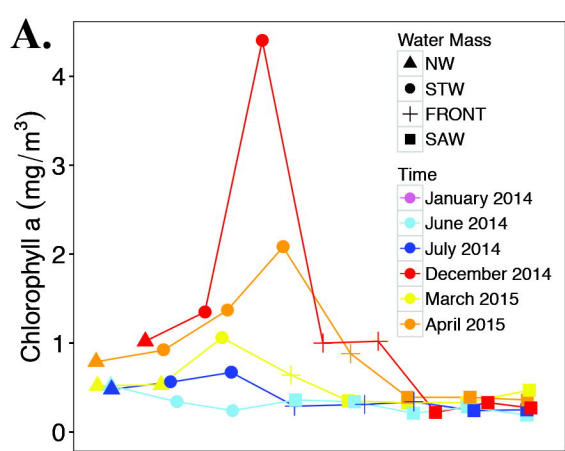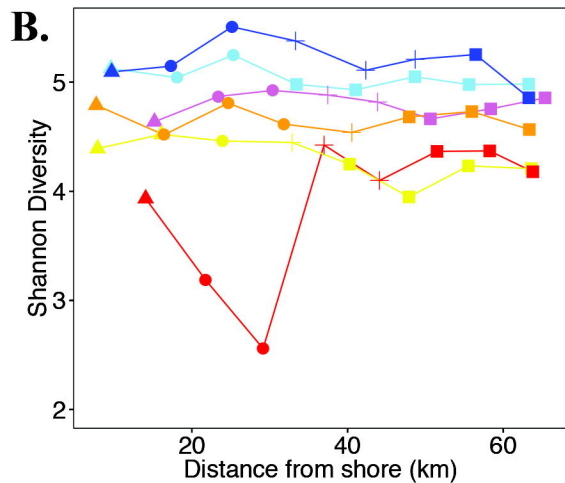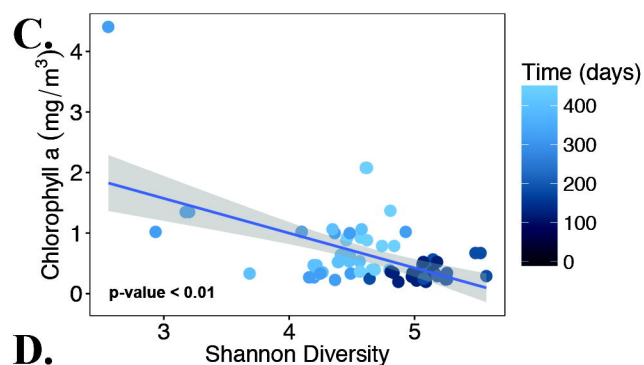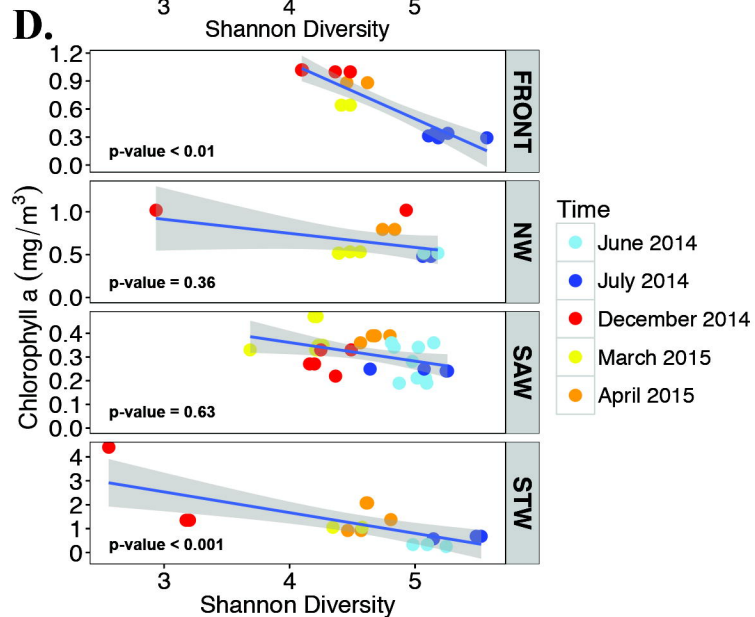

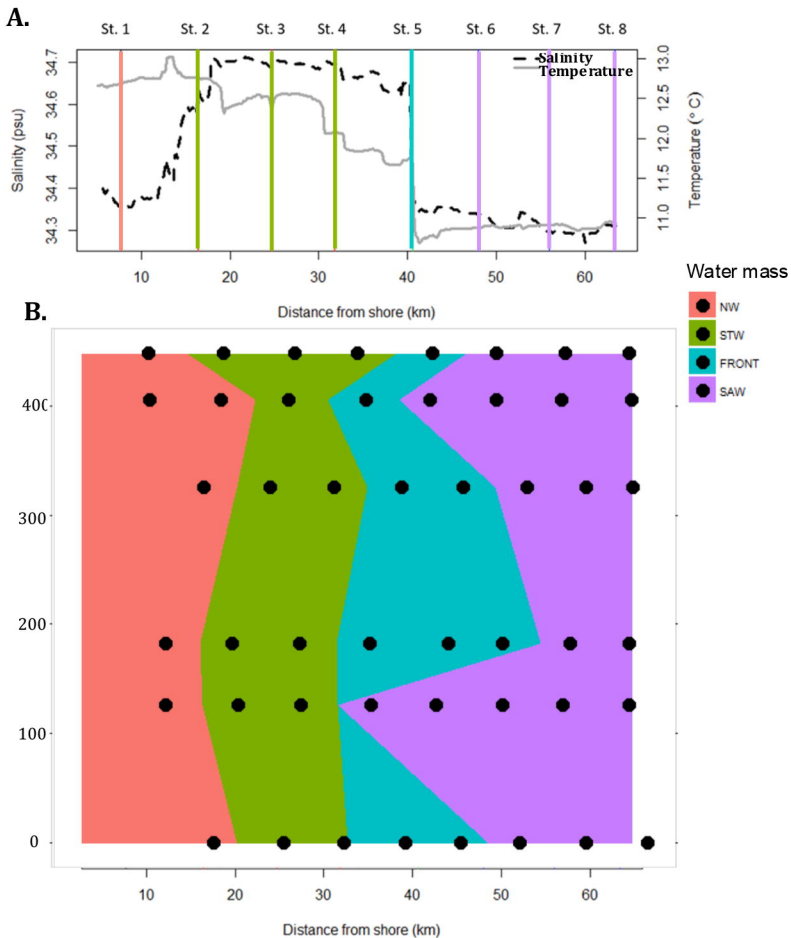

Source: http://www.biorxiv.org/content/10.1101/109868v1.full.pdf
